# Supplementary material for: Protein Adsorption onto Modified Porous Silica by Single and Binary Human Serum Protein Solutions
Source: MDPI journal article supplement (doi:10.3390/ijms22179164), 2021-08-25
Supplement: s1 [file s1]

## Immunoglobulin G protein

(A)

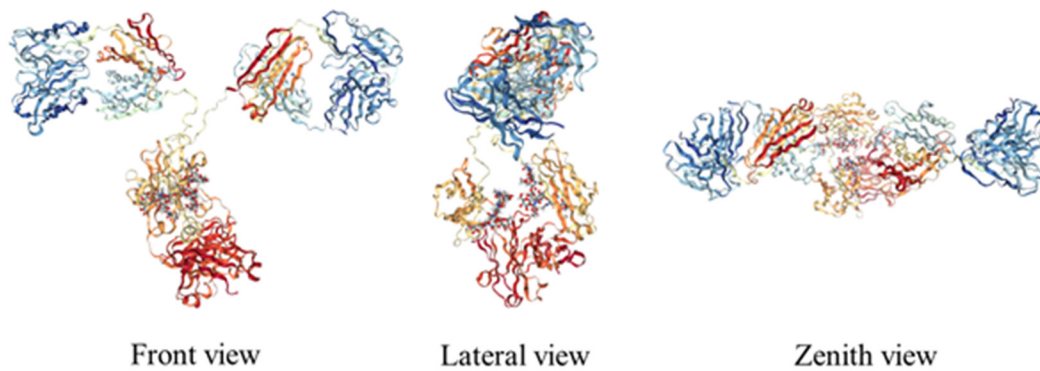

## Human Serum Albumin protein

(B)

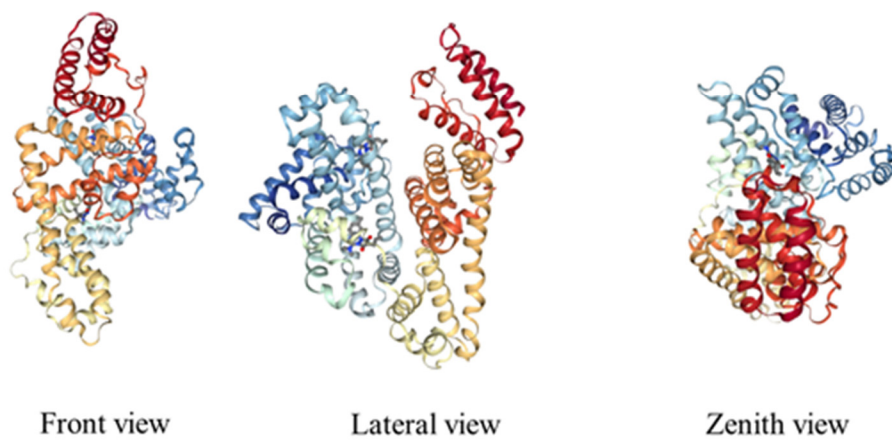

Figure S1. Crystal structure of IgG (A) and HSA (B). Source: Protein Data Bank.

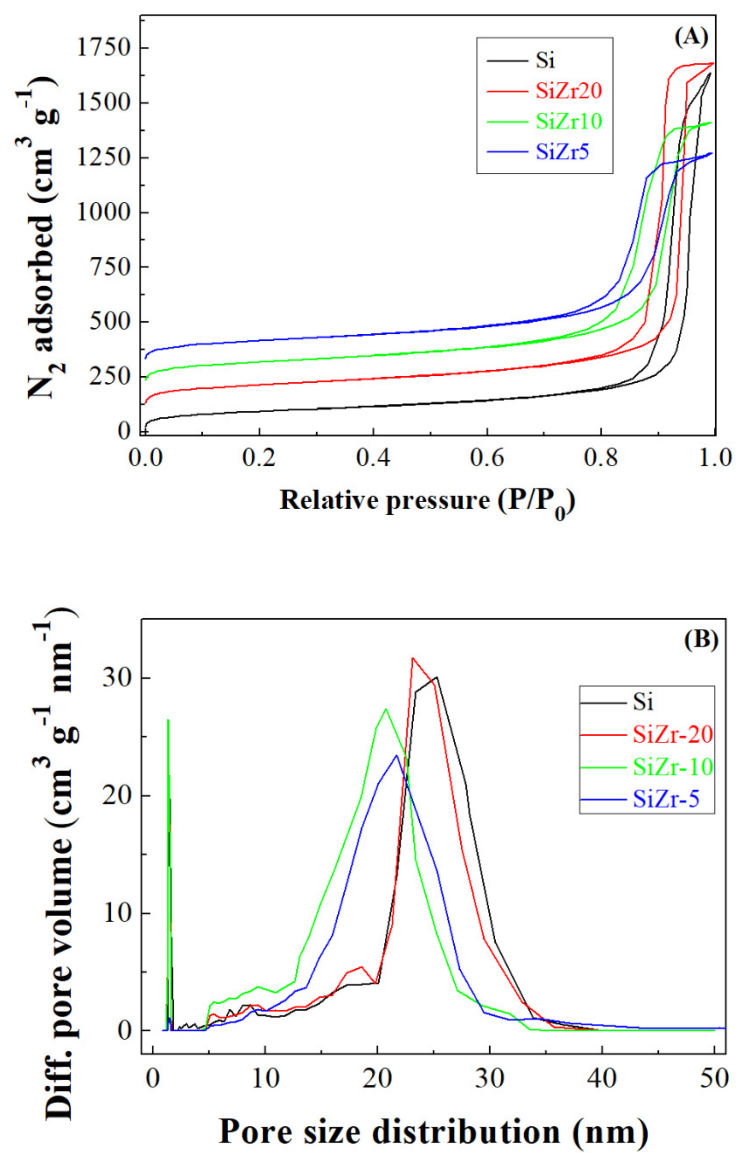

Figure S2. N<sub>2</sub> adsorption-desorption isotherms at -196 °C (A) and pore size distribution estimated from the DFT method (B) of the Si, SiZr20, SiZr10 and SiZr5 samples.

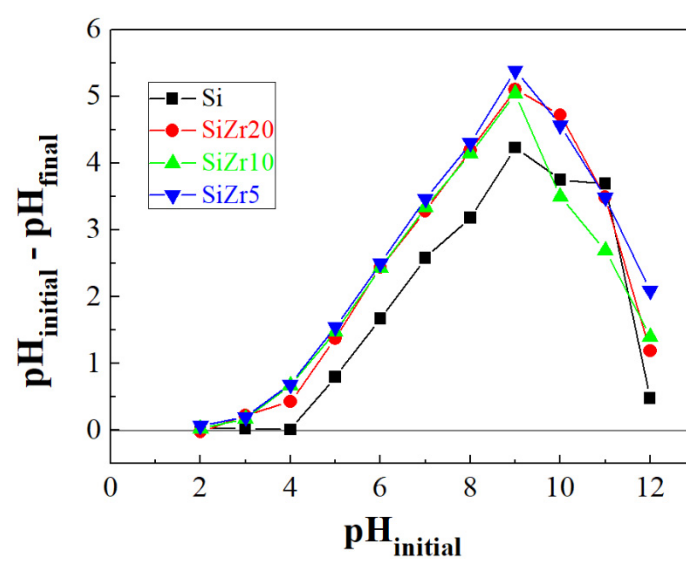

Figure S3. Zero point charge ( $\text{pH}_{\text{ZPC}}$ ) of the Si, SiZr20, SiZr10 and SiZr5 samples.

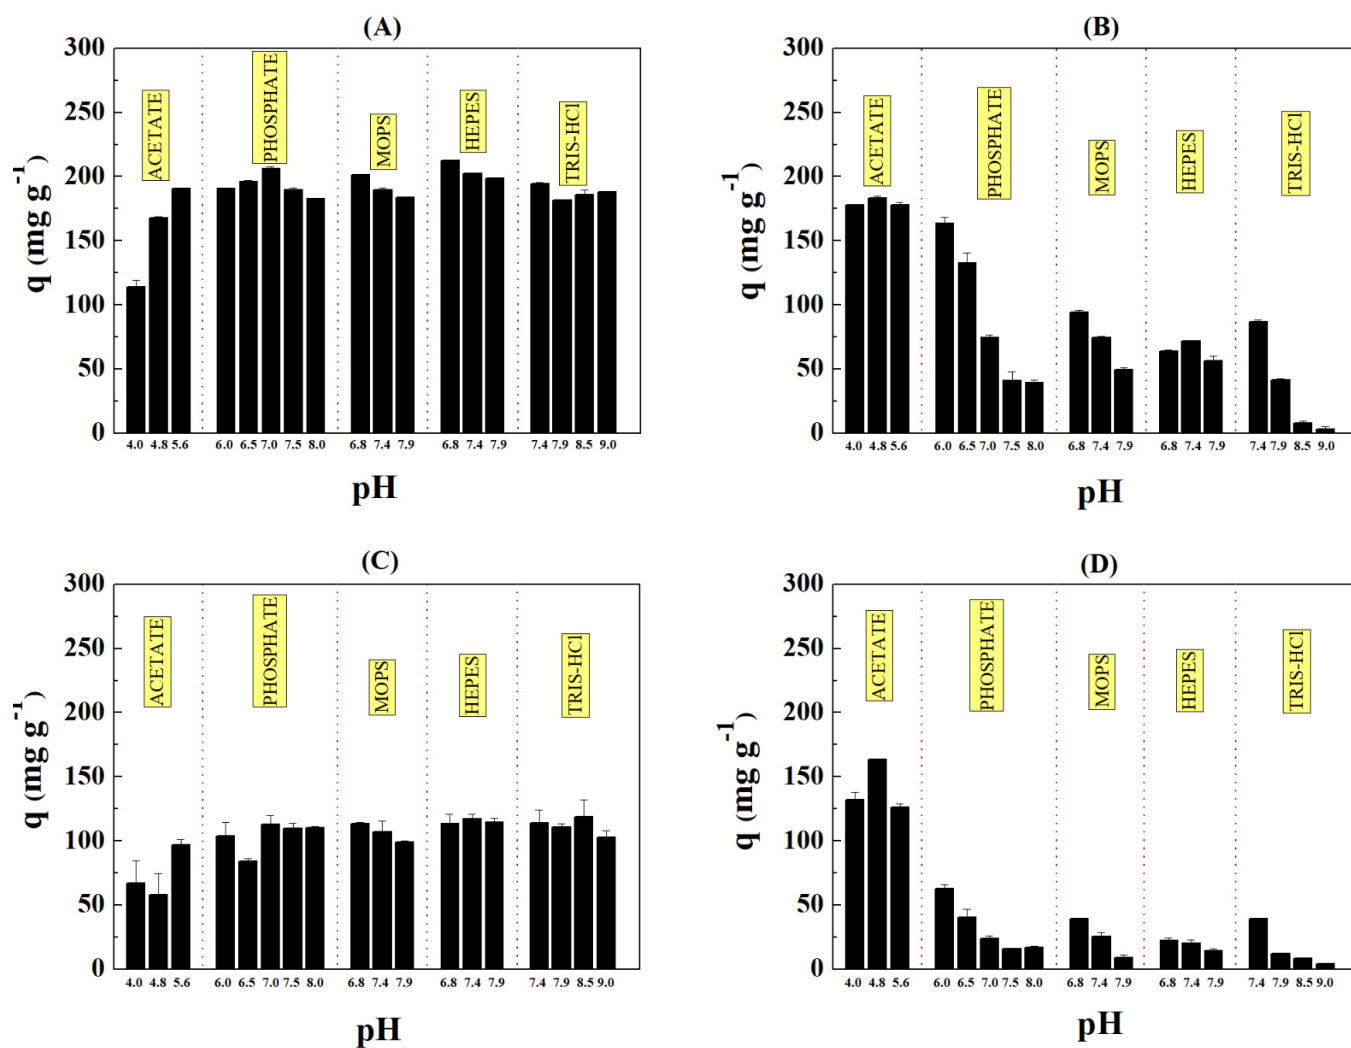

Figure S4. Influence of pH range on the adsorption capacity of IgG and HSA ( $C_{\text{initial}}$ : 1.0 mg mL<sup>-1</sup>). (A) Si sample with IgG, B) Si sample with HSA, C) SiZr5 with IgG e D) SiZr5 with HSA. pH range of each buffer: acetate (4.0-5.6), phosphate (6.0-8.0), MOPS (6.5-7.9), HEPES (6.8-8.0) and TRIS (7.2-9.0).

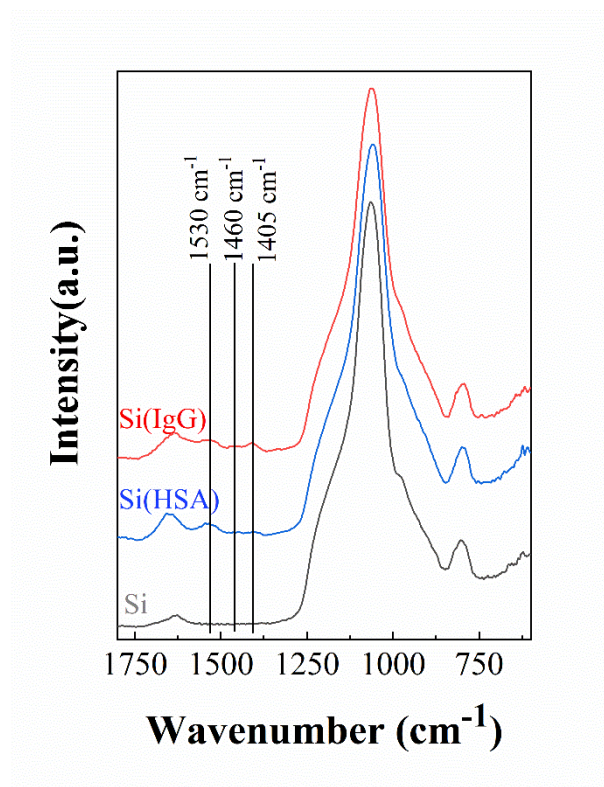

Figure S5. FT-IR spectra of the Si-sample before and after the IgG and HSA adsorption.

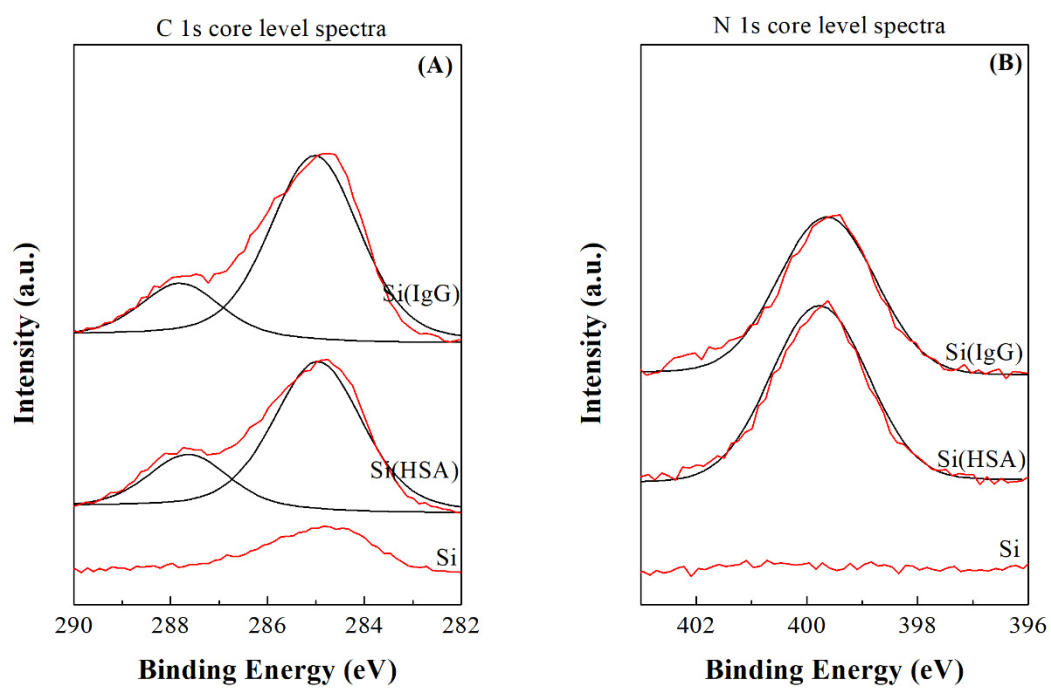

Figure S6. XPS spectra of the Si-sample before and after the IgG and HSA adsorption. C 1 core level spectra (A) and N 1s core level spectra (B).

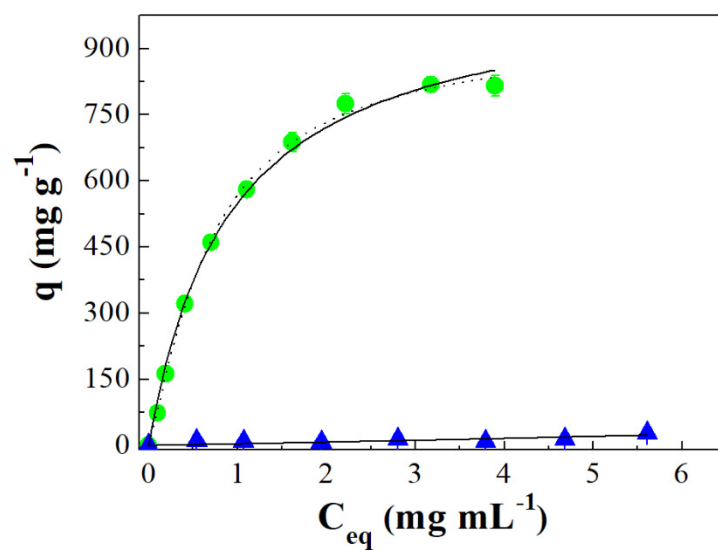

Figure S7. Adsorption isotherm of IgG (●) and HSA (▲) in Si adsorbent (B) using TRIS-HCl at pH 9.0. Adjusted models of Langmuir (dashed black line) and Langmuir-Freundlich (continuous black line).

**Table S1.** Binary (IgG/HSA) protein concentration diluted in TRIS/HCl 25 mM buffer at pH 9.0 for each case tested.

| Binary<br>concentration<br>(mg mL <sup>-1</sup> ) | CASE I                                             |            | CASE II    |            | CASE III   |            |
|---------------------------------------------------|----------------------------------------------------|------------|------------|------------|------------|------------|
|                                                   | IgG<br>(%)                                         | HSA<br>(%) | IgG<br>(%) | HSA<br>(%) | IgG<br>(%) | HSA<br>(%) |
|                                                   | 25                                                 | 75         | 50         | 50         | 75         | 25         |
|                                                   | IgG or HSA concentration<br>(mg mL <sup>-1</sup> ) |            |            |            |            |            |
|                                                   | IgG                                                | HSA        | IgG        | HSA        | IgG        | HSA        |
| 0.5                                               | 0.25                                               | 0.75       | 0.50       | 0.50       | 0.75       | 0.25       |
| 1.0                                               | 0.50                                               | 1.5        | 1.0        | 1.0        | 1.5        | 0.50       |
| 2.0                                               | 1.0                                                | 3.0        | 2.0        | 2.0        | 3.0        | 1.0        |
| 4.0                                               | 2.0                                                | 6.0        | 4.0        | 4.0        | 6.0        | 2.0        |
| 5.0                                               | 2.5                                                | 7.5        | 5.0        | 5.0        | 7.5        | 2.5        |
| 6.0                                               | 3.0                                                | 9.0        | 6.0        | 6.0        | 9.0        | 3.0        |



**Table S2.** Langmuir (L) and Langmuir-Freundlich (LF) parameters for the IgG and HSA adsorption in silica and Zr-doped mesoporous silica using acetate buffer at pH 4.8.

| Parameters                      | Si              |                 | SiZr20          |                 | SiZr10         |                 | SiZr5          |                 |
|---------------------------------|-----------------|-----------------|-----------------|-----------------|----------------|-----------------|----------------|-----------------|
|                                 | L               | LF              | L               | LF              | L              | LF              | L              | LF              |
| <b>IgG (pH=4.8)</b>             |                 |                 |                 |                 |                |                 |                |                 |
| $q_{max}$ (mg g <sup>-1</sup> ) | 454.7<br>± 36.9 | 594.9<br>± 30.8 | 215.1<br>± 20.5 | 252.6<br>± 89.5 | 140.4<br>± 5.6 | 192.5<br>± 27.1 | 107.1<br>± 4.9 | 111.7<br>± 15.0 |
| $k_L$ (mL mg <sup>-1</sup> )    | 36.0<br>± 12.9  | -               | 1.4<br>± 0.51   | -               | 3.9<br>± 0.83  | -               | 8.5<br>± 2.6   | -               |
| $k_{LF}$ (mL mg <sup>-1</sup> ) | -               | 4.6<br>± 0.26   | -               | 0.93<br>± 0.42  | -              | 0.56<br>± 0.23  | -              | 8.2<br>± 2.5    |
| R <sup>2</sup>                  | 0.92            | 0.95            | 0.92            | 0.99            | 0.98           | 0.99            | 0.96           | 0.96            |
| N                               | -               | 10.1<br>± 3.3   | -               | 0.56<br>± 0.22  | -              | 0.34<br>± 0.18  | -              | 0.80<br>± 0.17  |
| <b>HSA (pH=4.8)</b>             |                 |                 |                 |                 |                |                 |                |                 |
| $q_{max}$ (mg g <sup>-1</sup> ) | 578.7<br>± 16.4 | 607.2<br>± 40.3 | 628.1<br>± 34.4 | 591.9<br>± 17.1 | 423.5<br>± 8.4 | 507.2<br>± 40.3 | 298.1<br>± 8.9 | 355.0<br>± 29.0 |
| $k_L$ (mL mg <sup>-1</sup> )    | 11.6<br>± 2.0   | -               | 3.47<br>± 1.4   | -               | 2.33<br>± 1.1  | -               | 2.9<br>± 0.7   | -               |
| $k_{LF}$ (mL mg <sup>-1</sup> ) | -               | 18.9<br>± 2.1   | -               | 10.6<br>± 1.4   | -              | 4.9<br>± 1.1    | -              | 3.6<br>± 0.9    |
| R <sup>2</sup>                  | 0.99            | 0.99            | 0.94            | 0.99            | 0.99           | 0.99            | 0.98           | 0.99            |
| N                               | -               | 0.84<br>± 0.15  | -               | 2.0<br>± 0.69   | -              | 0.84<br>± 0.15  | -              | 0.67<br>± 0.17  |

**Table S3.** Langmuir (L) and Langmuir-Freundlich (LF) parameters for the IgG and HSA adsorption in silica and Zr-doped mesoporous silica using phosphate buffer at pH 7.0.

| Parameters                      | Si              |                 | SiZr20          |                 | SiZr10          |                 | SiZr5           |                 |
|---------------------------------|-----------------|-----------------|-----------------|-----------------|-----------------|-----------------|-----------------|-----------------|
|                                 | L               | LF              | L               | LF              | L               | LF              | L               | LF              |
| <b>IgG (pH=7.0)</b>             |                 |                 |                 |                 |                 |                 |                 |                 |
| $q_{max}$ (mg g <sup>-1</sup> ) | 689.0<br>± 20.9 | 691.4<br>± 29.4 | 311.3<br>± 29.4 | 325.8<br>± 7.3  | 378.9<br>± 44.2 | 386.5<br>± 31.5 | 333.2<br>± 36.5 | 330.2<br>± 21.5 |
| $k_L$ (mL mg <sup>-1</sup> )    | 17.44<br>± 2.7  | -               | 7.73<br>± 4.4   | -               | 3.96<br>± 1.81  | -               | 1.96<br>± 0.21  | -               |
| $k_{LF}$ (mL mg <sup>-1</sup> ) | -               | 17.2<br>± 4.0   | -               | 7.3<br>± 3.91   | -               | 4.0<br>± 2.21   | -               | 2.3<br>± 0.75   |
| R <sup>2</sup>                  | 0.98            | 0.98            | 0.83            | 0.88            | 0.83            | 0.87            | 0.89            | 0.90            |
| $N$                             | -               | 0.98<br>± 0.19  | -               | 0.83<br>± 0.27  | -               | 0.88<br>± 0.35  | -               | 0.83<br>± 0.19  |
| <b>HSA (pH= 7.0)</b>            |                 |                 |                 |                 |                 |                 |                 |                 |
| $q_{max}$ (mg g <sup>-1</sup> ) | 232.8<br>± 8.9  | 215.1<br>± 14.5 | 648.4<br>± 73.3 | 407.2<br>± 50.4 | 539.1<br>± 57.1 | 428.6<br>± 55.0 | 106.7<br>± 18.6 | 78.4<br>± 6.9   |
| $k_L$ (mL mg <sup>-1</sup> )    | 10.4<br>± 2.4   | -               | 16.7<br>± 3.7   | -               | 12.0<br>± 2.54  | -               | 18.5<br>± 8.7   | -               |
| $k_{LF}$ (mL mg <sup>-1</sup> ) | -               | 1.18<br>± 0.24  | -               | 5.73<br>± 0.73  | -               | 10.7<br>± 3.1   | -               | 13.1<br>± 3.3   |
| R <sup>2</sup>                  | 0.99            | 0.99            | 0.99            | 0.98            | 0.99            | 0.99            | 0.91            | 0.95            |
| $N$                             | -               | 1.17<br>± 0.16  | -               | 1.28<br>± 0.11  | -               | 1.1<br>± 0.15   | -               | 2.2<br>± 0.31   |
